# Supplementary material
Source: Springer Nature journal article supplement (https://www.springermedizin.de/resource/supplementary/12889_2012_4713_MOESM1_ESM.pdf/9492790)
Supplement: MOESM1 [file 9492790]

Search strategy using highly discriminatory KT terms

| Electronic databases searched | Search terms used                                                                                                                                                                                                                                                                                                                                                                                                                                                                                                                                                                                                                                                                                                                                                                                                                                                                                                                                                                                                                                                                                                                                                                                                                            | Total hits                                                                                                                                                                                                                                                                    |
|-------------------------------|----------------------------------------------------------------------------------------------------------------------------------------------------------------------------------------------------------------------------------------------------------------------------------------------------------------------------------------------------------------------------------------------------------------------------------------------------------------------------------------------------------------------------------------------------------------------------------------------------------------------------------------------------------------------------------------------------------------------------------------------------------------------------------------------------------------------------------------------------------------------------------------------------------------------------------------------------------------------------------------------------------------------------------------------------------------------------------------------------------------------------------------------------------------------------------------------------------------------------------------------|-------------------------------------------------------------------------------------------------------------------------------------------------------------------------------------------------------------------------------------------------------------------------------|
| CINAHL<br>(2000-Present)      | <ol style="list-style-type: none"> <li>1. clinical trials/</li> <li>2. control\$.tw.</li> <li>3. random\$.tw.</li> <li>4. comparative studies/</li> <li>5. experiment\$.tw.</li> <li>6. (time adj series). tw</li> <li>7. impact.tw.</li> <li>8. intervention\$.tw.</li> <li>9. evaluat\$.tw.</li> <li>10. effect?.tw.</li> <li>11. exp pretest-posttest desgin/</li> <li>12. exp quasi-experimental studies/</li> <li>13. or/1-12</li> <li>14. "cochrane database of systematic reviews".jn.</li> <li>15. 13 not 14</li> <li>16. author's strategy and 15</li> </ol> <p style="text-align: center;"><b>AND</b></p> <p>Community OR Public Health*</p> <p style="text-align: center;"><b>AND</b></p> <p><i>Implementation</i><br/> <i>Adoption</i><br/> <i>Quality Improvement</i><br/> <i>Dissemination</i><br/> <i>Complex intervention:</i><br/> <i>Implementation (w/3) research</i><br/> <i>Complex intervention</i></p> <p><b>Information</b><br/> <b>Change</b><br/> <b>Evaluation</b><br/> <b>Implementation</b><br/> <b>Utiliz/sation</b><br/> <b>Adoption</b><br/> <b>Quality improvement</b><br/> <b>Dissemination</b><br/> <b>Complex intervention:</b><br/> <b>Complex intervention</b><br/> <b>Institutionaliz/sation*</b></p> | <p>23430 (For high and medium discriminatory terms combined)</p> <p>*Note:<br/> <i>Italic terms</i> discriminate KT articles from non-KT articles for all KT papers.<br/> <b>Bold terms</b> discriminate KT articles from non-KT articles for KT application papers only.</p> |

Search strategy using highly discriminatory KT terms

| Electronic databases searched | Search terms used                                                                                                                                                                                                                                                                                                                                                                                                                                                                                                                                                                                                                                                                                                                                                                                                                                                                                                                                                                                                                                                                                                                                                                                                                                                                                                                                      | Total hits                                                                                                                                                                                                                                                                                         |
|-------------------------------|--------------------------------------------------------------------------------------------------------------------------------------------------------------------------------------------------------------------------------------------------------------------------------------------------------------------------------------------------------------------------------------------------------------------------------------------------------------------------------------------------------------------------------------------------------------------------------------------------------------------------------------------------------------------------------------------------------------------------------------------------------------------------------------------------------------------------------------------------------------------------------------------------------------------------------------------------------------------------------------------------------------------------------------------------------------------------------------------------------------------------------------------------------------------------------------------------------------------------------------------------------------------------------------------------------------------------------------------------------|----------------------------------------------------------------------------------------------------------------------------------------------------------------------------------------------------------------------------------------------------------------------------------------------------|
| EMBASE<br>(2000-Present)      | <p>1. Randomized controlled trial/<br/>                 2. random\$.tw.<br/>                 3. experiment\$.tw.<br/>                 4. (time adj series).tw.<br/>                 5. (pre test or pretest or post test or posttest).tw.<br/>                 6. impact.tw.<br/>                 7. intervention\$.tw.<br/>                 8. chang\$.tw.<br/>                 9. evaluat\$.tw.<br/>                 10. effect?.tw.<br/>                 11. compar\$.tw.<br/>                 12. control\$.tw.<br/>                 13. or/1-12<br/>                 14. Nonhuman/<br/>                 15 13 not 14<br/>                 16. author's strategy and 15</p> <p style="text-align: center;"><b>AND</b></p> <p>Community OR Public Health*</p> <p style="text-align: center;"><b>AND</b></p> <p><i>Implementation</i><br/> <i>Adoption</i><br/> <i>Quality Improvement</i><br/> <i>Dissemination</i><br/> <i>Complex intervention:</i><br/> <i>Implementation (w/3) research</i><br/> <i>Complex intervention</i></p> <p><b>Information</b><br/> <b>Change</b><br/> <b>Evaluation</b><br/> <b>Implementation</b><br/> <b>Utiliz/sation</b><br/> <b>Adoption</b><br/> <b>Quality improvement</b><br/> <b>Dissemination</b><br/> <b>Complex intervention:</b><br/> <b>Complex intervention</b><br/> <b>Institutionaliz/sation*</b></p> | <p>36469<br/>                 (For high and medium discriminatory terms combined)</p> <p>*Note:<br/> <i>Italic terms</i> discriminate KT articles from non-KT articles for all KT papers.<br/> <b>Bold terms</b> discriminate KT articles from non-KT articles for KT application papers only.</p> |

Search strategy using highly discriminatory KT terms

| Electronic databases searched | Search terms used                                                                                                                                                                                                                                                                                                                                                                                                                                                                                                                                                                                                                                                                                                                                                                                                                                                                                                                                                                                                                                                                                     | Total hits                                                                                                                                                                                                                                                                                         |
|-------------------------------|-------------------------------------------------------------------------------------------------------------------------------------------------------------------------------------------------------------------------------------------------------------------------------------------------------------------------------------------------------------------------------------------------------------------------------------------------------------------------------------------------------------------------------------------------------------------------------------------------------------------------------------------------------------------------------------------------------------------------------------------------------------------------------------------------------------------------------------------------------------------------------------------------------------------------------------------------------------------------------------------------------------------------------------------------------------------------------------------------------|----------------------------------------------------------------------------------------------------------------------------------------------------------------------------------------------------------------------------------------------------------------------------------------------------|
| MEDLINE<br>(2000-Present)     | <p>1. randomized controlled trial.pt.<br/>                 2. random\$.tw.<br/>                 3. control\$.tw.<br/>                 4. intervention\$.tw.<br/>                 5. evaluat\$.tw.<br/>                 6. or/1-5<br/>                 7. animal/<br/>                 8. human/<br/>                 9. 7 not (7 and 8)<br/>                 10. 6 not 9<br/>                 11. author's strategy and 10</p> <p style="text-align: center;"><b>AND</b></p> <p>Community OR Public Health*</p> <p style="text-align: center;"><b>AND</b></p> <p><i>Implementation</i><br/> <i>Adoption</i><br/> <i>Quality Improvement</i><br/> <i>Dissemination</i><br/> <i>Complex intervention:</i><br/> <i>Implementation (w/3) research</i><br/> <i>Complex intervention</i></p> <p><b>Information</b><br/> <b>Change</b><br/> <b>Evaluation</b><br/> <b>Implementation</b><br/> <b>Utiliz/sation</b><br/> <b>Adoption</b><br/> <b>Quality improvement</b><br/> <b>Dissemination</b><br/> <b>Complex intervention:</b><br/> <b>Complex intervention</b><br/> <b>Institutionaliz/sation*</b></p> | <p>30357<br/>                 (For high and medium discriminatory terms combined)</p> <p>*Note:<br/> <i>Italic terms</i> discriminate KT articles from non-KT articles for all KT papers.<br/> <b>Bold terms</b> discriminate KT articles from non-KT articles for KT application papers only.</p> |

Search strategy using highly discriminatory KT terms

| Electronic databases searched                                | Search terms used                                                                                                                                                                                                                                                                                                                                                                                                                                                                                                                                 | Total hits                                                                                                                                                                                                                                                           |
|--------------------------------------------------------------|---------------------------------------------------------------------------------------------------------------------------------------------------------------------------------------------------------------------------------------------------------------------------------------------------------------------------------------------------------------------------------------------------------------------------------------------------------------------------------------------------------------------------------------------------|----------------------------------------------------------------------------------------------------------------------------------------------------------------------------------------------------------------------------------------------------------------------|
| The Cochrane Library<br>Systematic Reviews<br>(2000-Present) | Community OR Public Health*<br><br><b>AND</b><br><br><i>Implementation</i><br><i>Adoption</i><br><i>Quality Improvement</i><br><i>Dissemination</i><br><i>Complex intervention:</i><br><i>Implementation (w/3) research</i><br><i>Complex intervention</i><br><b>Information</b><br><b>Change</b><br><b>Evaluation</b><br><b>Implementation</b><br><b>Utiliz/sation</b><br><b>Adoption</b><br><b>Quality improvement</b><br><b>Dissemination</b><br><b>Complex intervention:</b><br><b>Complex intervention</b><br><b>Institutionaliz/sation*</b> | 2292<br>(For high and medium discriminatory terms combined)<br><br>*Note:<br><i>Italic terms</i> discriminate KT articles from non-KT articles for all KT papers.<br><b>Bold terms</b> discriminate KT articles from non-KT articles for KT application papers only. |

Search strategy using medium discriminatory KT terms

| Electronic databases searched | Search terms used                                                                                                                                                                                                                                                                                                                                                                                                                                                                                                                                                                                                                                                                                                                                                                                                                                                                                                                                                                                                                                                                                                                                                      | Total hits                                                                                                                                                                                                                                                                    |
|-------------------------------|------------------------------------------------------------------------------------------------------------------------------------------------------------------------------------------------------------------------------------------------------------------------------------------------------------------------------------------------------------------------------------------------------------------------------------------------------------------------------------------------------------------------------------------------------------------------------------------------------------------------------------------------------------------------------------------------------------------------------------------------------------------------------------------------------------------------------------------------------------------------------------------------------------------------------------------------------------------------------------------------------------------------------------------------------------------------------------------------------------------------------------------------------------------------|-------------------------------------------------------------------------------------------------------------------------------------------------------------------------------------------------------------------------------------------------------------------------------|
| CINAHL<br>(2000-Present)      | <ol style="list-style-type: none"> <li>1. clinical trials/</li> <li>2. control\$.tw.</li> <li>3. random\$.tw.</li> <li>4. comparative studies/</li> <li>5. experiment\$.tw.</li> <li>6. (time adj series). tw</li> <li>7. impact.tw.</li> <li>8. intervention\$.tw.</li> <li>9. evaluat\$.tw.</li> <li>10. effect?.tw.</li> <li>11. exp pretest-posttest desgin/</li> <li>12. exp quasi-experimental studies/</li> <li>13. or/1-12</li> <li>14. "cochrane database of systematic reviews".jn.</li> <li>15. 13 not 14</li> <li>16. author's strategy and 15</li> </ol> <p style="text-align: center;"><b>AND</b></p> <p>Community OR Public Health*</p> <p style="text-align: center;"><b>AND</b></p> <p><i>Change</i><br/> <i>Organiz/sational innovation</i><br/> <i>Innovation</i><br/> <i>Best practice:</i><br/> <i>Institutionali/sation</i><br/> <i>Diffusion of innovation</i><br/> <i>Translational research</i><br/> <b>Policy</b><br/> <b>Policies</b><br/> <b>Best practice:</b><br/> <b>Best practice</b><br/> <b>Continuing education</b><br/> <b>Implementation (w/3) research</b><br/> <b>Service innovation*</b><br/> <b>Linkage and exchange*</b></p> | <p>23430 (For high and medium discriminatory terms combined)</p> <p>*Note:<br/> <i>Italic terms</i> discriminate KT articles from non-KT articles for all KT papers.<br/> <b>Bold terms</b> discriminate KT articles from non-KT articles for KT application papers only.</p> |

Search strategy using medium discriminatory KT terms

| Electronic databases searched | Search terms used                                                                                                                                                                                                                                                                                                                                                                                                                                                                                                                                                                                                                                                                                                                                                                                                                                                                                                                                                                                                                                                                                                                                                                                                                                                              | Total hits                                                                                                                                                                                                                                                                                     |
|-------------------------------|--------------------------------------------------------------------------------------------------------------------------------------------------------------------------------------------------------------------------------------------------------------------------------------------------------------------------------------------------------------------------------------------------------------------------------------------------------------------------------------------------------------------------------------------------------------------------------------------------------------------------------------------------------------------------------------------------------------------------------------------------------------------------------------------------------------------------------------------------------------------------------------------------------------------------------------------------------------------------------------------------------------------------------------------------------------------------------------------------------------------------------------------------------------------------------------------------------------------------------------------------------------------------------|------------------------------------------------------------------------------------------------------------------------------------------------------------------------------------------------------------------------------------------------------------------------------------------------|
| EMBASE<br>(2000-Present)      | <p>1. Randomized controlled trial/<br/>                 2. random\$.tw.<br/>                 3. experiment\$.tw.<br/>                 4. (time adj series).tw.<br/>                 5. (pre test or pretest or post test or posttest).tw.<br/>                 6. impact.tw.<br/>                 7. intervention\$.tw.<br/>                 8. chang\$.tw.<br/>                 9. evaluat\$.tw.<br/>                 10. effect?.tw.<br/>                 11. compar\$.tw.<br/>                 12. control\$.tw.<br/>                 13. or/1-12<br/>                 14. Nonhuman/<br/>                 15. 13 not 14<br/>                 16. author's strategy and 15</p> <p style="text-align: center;"><b>AND</b></p> <p>Community OR Public Health*</p> <p style="text-align: center;"><b>AND</b></p> <p><i>Change</i><br/> <i>Organizational innovation</i><br/> <i>Innovation</i><br/> <i>Best practice:</i><br/> <i>Institutionalization</i><br/> <i>Diffusion of innovation</i><br/> <i>Translational research</i><br/> <b>Policy</b><br/> <b>Policies</b><br/> <b>Best practice:</b><br/> <b>Best practice</b><br/> <b>Continuing education</b><br/> <b>Implementation (w/3) research</b><br/> <b>Service innovation*</b><br/> <b>Linkage and exchange*</b></p> | <p>36469<br/>                 (High and medium discriminatory terms combined)</p> <p>*Note:<br/> <i>Italic terms</i> discriminate KT articles from non-KT articles for all KT papers.<br/> <b>Bold terms</b> discriminate KT articles from non-KT articles for KT application papers only.</p> |

Search strategy using medium discriminatory KT terms

| Electronic databases searched | Search terms used                                                                                                                                                                                                                                                                                                                                                                                                                                                                                                                                                                                                                                                                                                                                                                                                                                                                                                                                                                                                               | Total hits                                                                                                                                                                                                                                                                                     |
|-------------------------------|---------------------------------------------------------------------------------------------------------------------------------------------------------------------------------------------------------------------------------------------------------------------------------------------------------------------------------------------------------------------------------------------------------------------------------------------------------------------------------------------------------------------------------------------------------------------------------------------------------------------------------------------------------------------------------------------------------------------------------------------------------------------------------------------------------------------------------------------------------------------------------------------------------------------------------------------------------------------------------------------------------------------------------|------------------------------------------------------------------------------------------------------------------------------------------------------------------------------------------------------------------------------------------------------------------------------------------------|
| MEDLINE<br>(2000-Present)     | <p>1. randomized controlled trial.pt.<br/>                 2. random\$.tw.<br/>                 3. control\$.tw.<br/>                 4. intervention\$.tw.<br/>                 5. evaluat\$.tw.<br/>                 6. or/1-5<br/>                 7. animal/<br/>                 8. human/<br/>                 9. 7 not (7 and 8)<br/>                 10. 6 not 9<br/>                 11. author's strategy and 10</p> <p style="text-align: center;"><b>AND</b></p> <p>Community OR Public Health*</p> <p style="text-align: center;"><b>AND</b></p> <p><i>Change</i><br/> <i>Organiz/sational innovation</i><br/> <i>Innovation</i><br/> <i>Best practice:</i><br/> <i>Institutionali/sation</i><br/> <i>Diffusion of innovation</i><br/> <i>Translational research</i><br/> <b>Policy</b><br/> <b>Policies</b><br/> <b>Best practice:</b><br/> <b>Best practice</b><br/> <b>Continuing education</b><br/> <b>Implementation (w/3) research</b><br/> <b>Service innovation*</b><br/> <b>Linkage and exchange*</b></p> | <p>30357<br/>                 (High and medium discriminatory terms combined)</p> <p>*Note:<br/> <i>Italic terms</i> discriminate KT articles from non-KT articles for all KT papers.<br/> <b>Bold terms</b> discriminate KT articles from non-KT articles for KT application papers only.</p> |

Search strategy using medium discriminatory KT terms

| <b>Electronic databases searched</b>                         | <b>Search terms used</b>                                                                                                                                                                                                                                                                                                                                                                                                                                                            | <b>Total hits</b>                                                                                                                                                                                                                                                    |
|--------------------------------------------------------------|-------------------------------------------------------------------------------------------------------------------------------------------------------------------------------------------------------------------------------------------------------------------------------------------------------------------------------------------------------------------------------------------------------------------------------------------------------------------------------------|----------------------------------------------------------------------------------------------------------------------------------------------------------------------------------------------------------------------------------------------------------------------|
| The Cochrane Library<br>Systematic Reviews<br>(2000-Present) | Community OR Public Health*<br><br><b>AND</b><br><br><i>Change</i><br><i>Organiz/sational innovation</i><br><i>Innovation</i><br><i>Best practice:</i><br><i>Institutionali/sation</i><br><i>Diffusion of innovation</i><br><i>Translational research</i><br><b>Policy</b><br><b>Policies</b><br><b>Best practice:</b><br><b>Best practice</b><br><b>Continuing education</b><br><b>Implementation (w/3) research</b><br><b>Service innovation*</b><br><b>Linkage and exchange*</b> | 2292<br>(For high and medium discriminatory terms combined)<br><br>*Note:<br><i>Italic terms</i> discriminate KT articles from non-KT articles for all KT papers.<br><b>Bold terms</b> discriminate KT articles from non-KT articles for KT application papers only. |
